# Supplementary material for: A solution-assisted etching preparation of an MOF-derived NH4CoPO4·H2O/Ti3C2Tx MXene nanocomposite for high-performance hybrid supercapacitors
Source: Royal Society of Chemistry journal article supplement (doi:10.1039/d1nj01394g), 2021-01-01
Supplement: d1nj01394g1.pdf [file d1nj01394g1.pdf]

## Supporting Information

# **Solution Etching Assisted Preparation of MOF-derived $\text{NH}_4\text{CoPO}_4 \cdot \text{H}_2\text{O}/\text{Ti}_3\text{C}_2\text{T}_x$ MXene Nanocomposite for High-performance Hybrid Supercapacitor**

Wenhui Wei<sup>#</sup>, Shijian Luo<sup>#</sup>, Ying Zhao, Xiaoman Li, Bin Liang  
, Junzhuo Fang and Min Luo\*

*State Key Laboratory of High-efficiency Utilization of Coal and Green Chemical  
Engineering, School of Chemistry and Chemical Engineering, Ningxia  
University, Yinchuan, Ningxia, 750021, P.R.China*

*\*Corresponding author: Min Luo luominjy@nxu.edu.cn,*

*# These authors contributed equally to this work*

## Table of contents

1. Fig. S1: XRD pattern of ZIF-67,  $\text{Ti}_3\text{C}_2\text{T}_x$  and ZIF-67/ $\text{Ti}_3\text{C}_2\text{T}_x$ .
2. Fig. S2: Ti 2p XPS spectra of  $\text{Ti}_3\text{C}_2\text{T}_x$ .
3. Fig. S3: BET curve of  $\text{Ti}_3\text{C}_2\text{T}_x$ .
4. Fig. S4: SEM image of  $\text{Ti}_3\text{C}_2\text{T}_x$ .
5. Fig. S5: EDX elemental mapping (N, Co, P, O, C and Ti element) of  $\text{NH}_4\text{CoPO}_4 \cdot \text{H}_2\text{O}/\text{Ti}_3\text{C}_2\text{T}_x$ .
6. Fig. S6: EIS plot of  $\text{Ti}_3\text{C}_2\text{T}_x$ .
7. Fig. S7: CV curves of activated carbon and  $\text{NH}_4\text{CoPO}_4 \cdot \text{H}_2\text{O}/\text{Ti}_3\text{C}_2\text{T}_x$  at  $40 \text{ mV s}^{-1}$  in a three-electrode system.
8. Fig. S8: BET curve of AC.
9. Fig. S9: GCD curves of ASC at different voltage window at  $5 \text{ A g}^{-1}$ .
10. Fig. S10: EIS plots of ASC before and after 5000 cycles.
11. Fig. S11: Images of a LED driven by two serried ASCs.
12. Formula of the electrode density of ASC.

## EXPERIMENTAL SECTION

### ***Preparation of ZIF-67***

$\text{Co}(\text{NO}_3)_2 \cdot 6\text{H}_2\text{O}$  (1.746g) was dissolved in the mixture of 20 mL methanol and 20 mL ethanol. 2-Methylimidazole (1.979g) was dissolved in the mixture of 20 mL methanol and 20 mL ethanol. The above two solutions were then mixed under vigorous stirring for 30s, and the resulting solution was incubated at room temperature for 24h. The resulting purple precipitates were collected by centrifugation, washed by ethanol several times and finally vacuum-dried at 60°C.

### ***Preparation of ZIF-67/Ti<sub>3</sub>C<sub>2</sub>T<sub>x</sub>***

$\text{Co}(\text{NO}_3)_2 \cdot 6\text{H}_2\text{O}$  (1.746g) and  $\text{Ti}_3\text{C}_2\text{T}_x$  (1.0g) were added in the mixture of 20 mL methanol and 20 mL ethanol, marked A. 2-Methylimidazole (1.979g) was dissolved in the mixture of 20 mL methanol and 20 mL ethanol, marked B. Then the B solution was poured into A under vigorous stirring, and the resulting mixture was constantly stirred at room temperature for 24h. The resulting powder was collected by centrifugation, washed by ethanol several times and finally vacuum-dried at 60°C.

### ***Preparation of NH<sub>4</sub>CoPO<sub>4</sub> · H<sub>2</sub>O and NH<sub>4</sub>CoPO<sub>4</sub> · H<sub>2</sub>O/Ti<sub>3</sub>C<sub>2</sub>T<sub>x</sub>***

$(\text{NH}_4)_2 \cdot \text{HPO}_4$  (3.3g) was dissolved in 50 mL deionized water (DDW) to prepare 0.5M  $(\text{NH}_4)_2 \cdot \text{HPO}_4$  solution. Then, 2g ZIF-67 or 2g ZIF-67/Ti<sub>3</sub>C<sub>2</sub>T<sub>x</sub> was added into 0.5M  $(\text{NH}_4)_2 \cdot \text{HPO}_4$  solutions, respectively. The above resulting mixtures were constantly stirred at room temperature

for 6h. The resulting products were collected by centrifugation and finally dried at 60 °C to obtain  $\text{NH}_4\text{CoPO}_4 \cdot \text{H}_2\text{O}$  and  $\text{NH}_4\text{CoPO}_4 \cdot \text{H}_2\text{O}/\text{Ti}_3\text{C}_2\text{T}_x$ .

### ***Characterization***

X-ray diffraction (XRD) data were obtained from a AXS D8 ADVANCE A25 with Cu K $\alpha$  radiation (40 kV, 40 mA) of wavelength 0.154 nm (Germany). SEM images and Energy Dispersive Spectrometer (EDS) were collected from the ZEISS EVO18 scanning electron microscope at an accelerating voltage of 40 kV (Germany). XPS measurements were performed on a Thermo esca-lab 250Xi X-ray photoelectron spectrometer using Mg as the exciting source. The Raman spectra were collected on a Thermo Fisher Raman spectrometer under a backscattering geometry ( $\lambda = 532$  nm). The Brunauer-Emmett- Teller (BET) nitrogen physisorption experiments were carried out on a Qutatachrome Autosorb-iQC system.

### ***Electrochemical measurement***

Electrochemical studies on  $\text{NH}_4\text{CoPO}_4 \cdot \text{H}_2\text{O}$  and  $\text{NH}_4\text{CoPO}_4 \cdot \text{H}_2\text{O}/\text{Ti}_3\text{C}_2\text{T}_x$  were carried out on a CHI 660E electrochemical working station (Shanghai Chenhua Instrument, Inc.) using a three electrode cell with 1M KOH as the electrolyte. The working electrode was made from mixing of active materials, carbon black, and PVDF (polyvinylidene fluoride) with a weight ratio of 8:1:1, coating on a nickel foam of about 1 cm<sup>2</sup>. The typical mass load of electrode material is 2 mg.

The saturated calomel electrode (SCE) was used as reference electrode and platinum plate electrode as the counter electrode. Cyclic voltammetry and galvanostatic charge-discharge methods were used to investigate capacitance of electrode materials. And electrochemical impedance spectroscopy measurements were conducted at open circuit voltage.

### ***Fabrication of asymmetric supercapacitor (ASC)***

The asymmetric supercapacitor was assembled by using as prepared  $\text{NH}_4\text{CoPO}_4 \cdot \text{H}_2\text{O}/\text{Ti}_3\text{C}_2\text{T}_x$  as positive electrode and active carbon (AC) working electrode as negative electrode. For fabrication of AC working electrode, AC mixed with carbon black and PVDF in a mass ratio of 8:1:1 to form a paste and then was pasted onto a nickel foam. To get the best performance of ASC, the charge balance the relationship between the two electrodes should follow  $q^+ = q^-$ . To satisfy  $q^+ = q^-$ , the mass balancing between the two electrodes could be shown in the following the equation:

$$q = C \times \Delta V \times m \quad (\text{Formula S1})$$

$$m^+ / m^- = (C^- \times \Delta V^-) / (C^+ \times \Delta V^+) \quad (\text{Formula S2})$$

Where  $C$  ( $\text{F g}^{-1}$ ) is specific capacitance of electrode,  $m$  (g) is the active material mass on the electrode, and the  $\Delta V$  (V) is the potential window. According to the results of the GCD curves of  $\text{NH}_4\text{CoPO}_4 \cdot \text{H}_2\text{O}/\text{Ti}_3\text{C}_2\text{T}_x$  and AC, the optimal mass ratio between the two electrodes was calculation to be about  $m(\text{NH}_4\text{CoPO}_4 \cdot \text{H}_2\text{O}/\text{Ti}_3\text{C}_2\text{T}_x) / m(\text{AC}) = 1:3.3$  in the ASC.

Usually, the mass of AC is 5 mg and  $\text{NH}_4\text{CoPO}_4 \cdot \text{H}_2\text{O}/\text{Ti}_3\text{C}_2\text{T}_x$  is 1.5 mg in fabricated ASC.

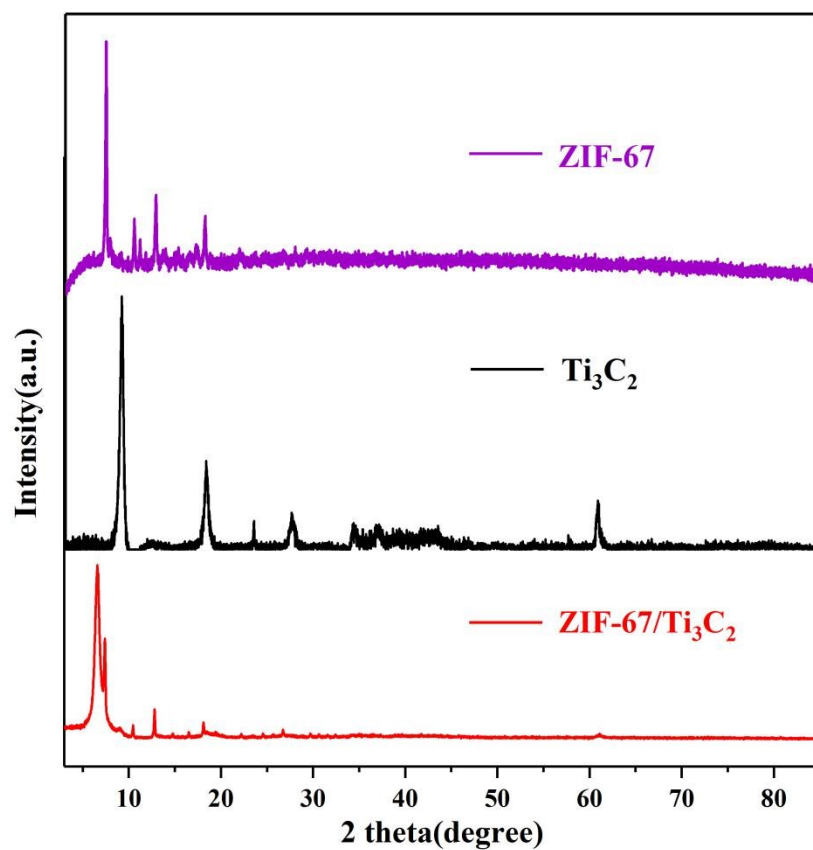

**Fig. S1** XRD pattern of ZIF-67,  $\text{Ti}_3\text{C}_2\text{T}_x$  and ZIF-67/ $\text{Ti}_3\text{C}_2\text{T}_x$ .

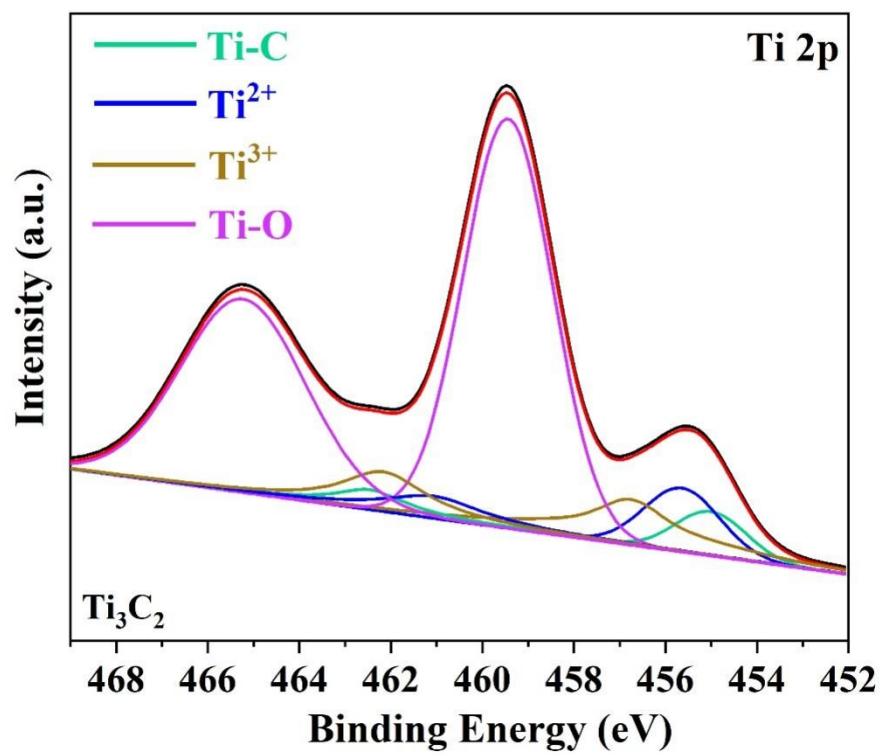

**Fig. S2** Ti 2p XPS spectra of  $\text{Ti}_3\text{C}_2\text{T}_x$ .

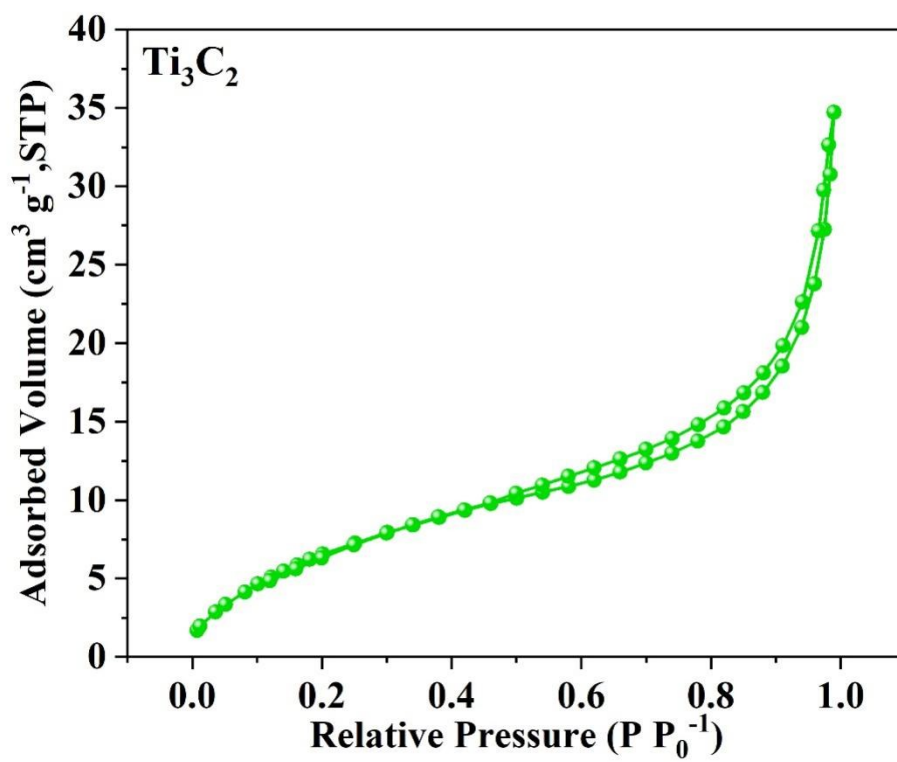

**Fig. S3** BET curve of Ti<sub>3</sub>C<sub>2</sub>T<sub>x</sub>.



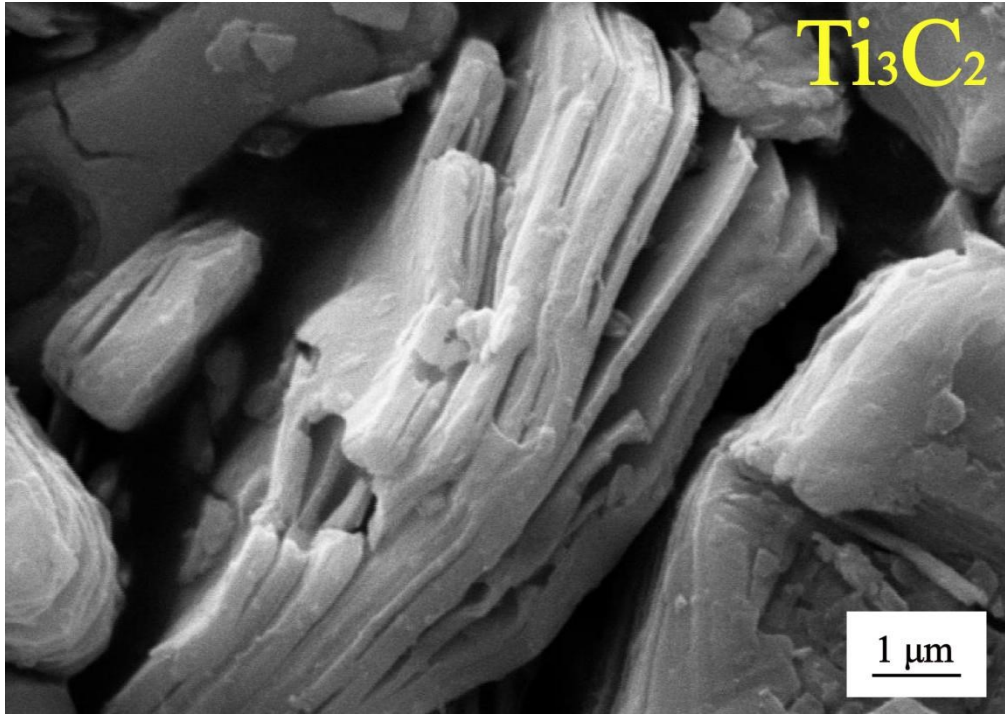

**Fig. S4** SEM image of  $\text{Ti}_3\text{C}_2\text{T}_x$ .

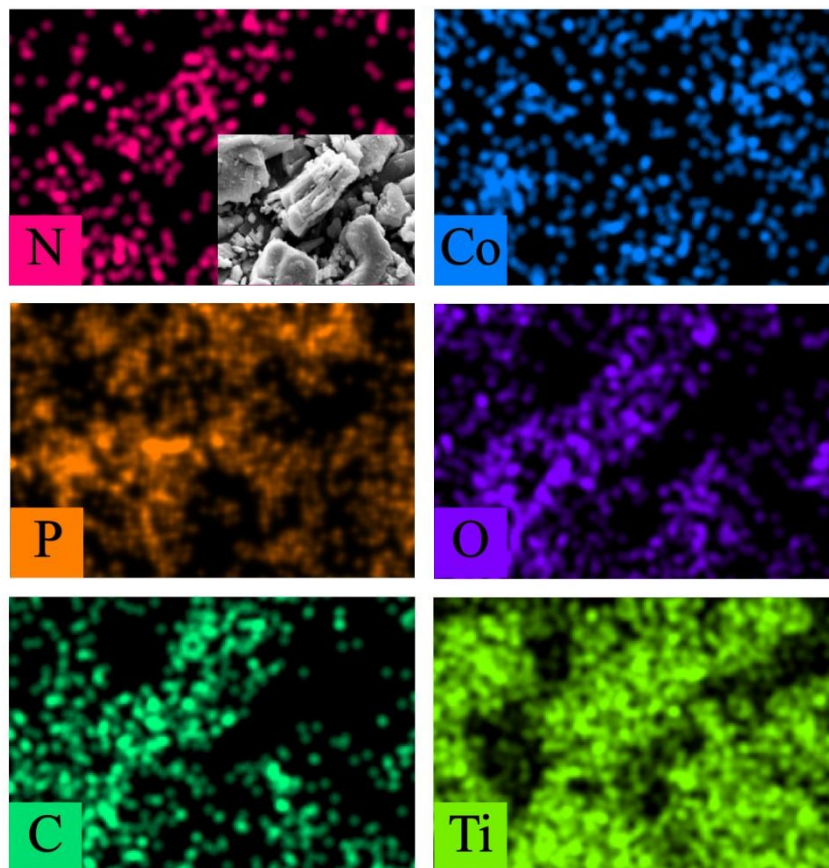

**Fig. S5** EDX elemental mapping (N, Co, P, O, C and Ti element) of

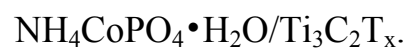

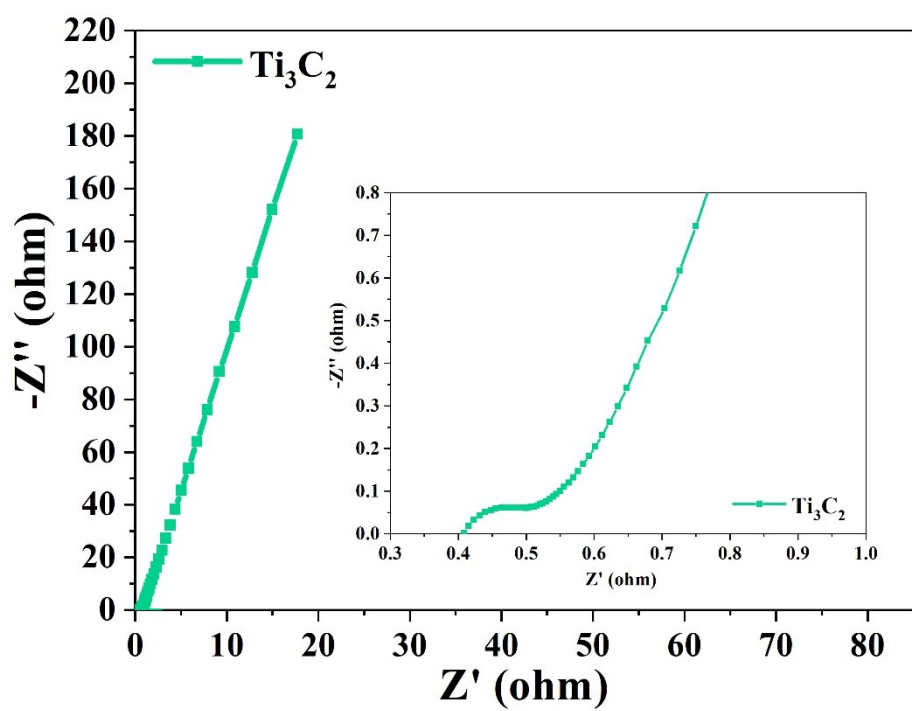

Fig. S6 EIS plot of  $\text{Ti}_3\text{C}_2\text{T}_x$ .

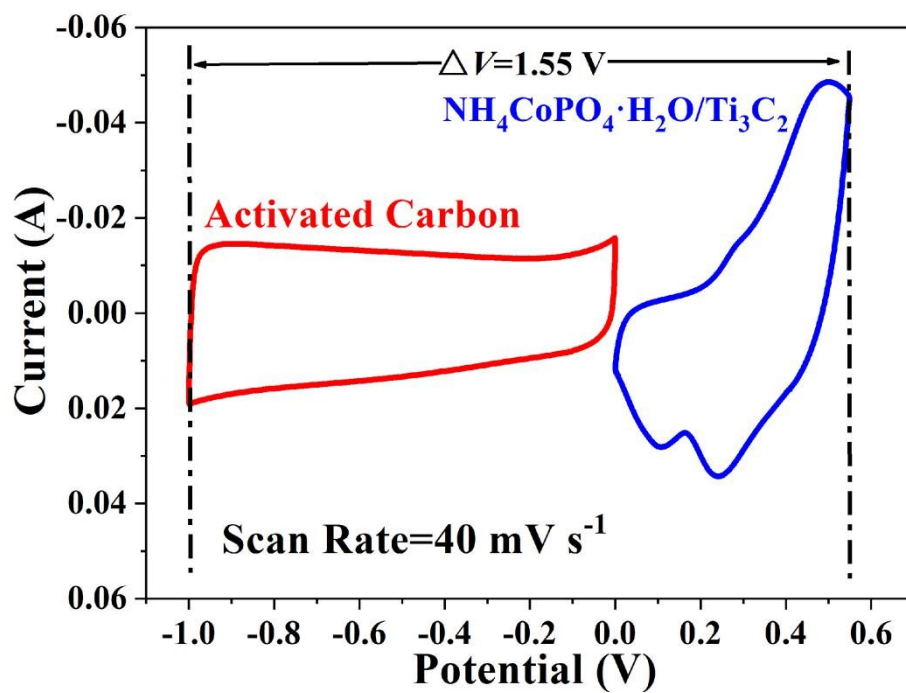

**Fig. S7** CV curves of activated carbon and  $\text{NH}_4\text{CoPO}_4 \cdot \text{H}_2\text{O}/\text{Ti}_3\text{C}_2\text{T}_x$  at 40  $\text{mV s}^{-1}$  in a three-electrode system.

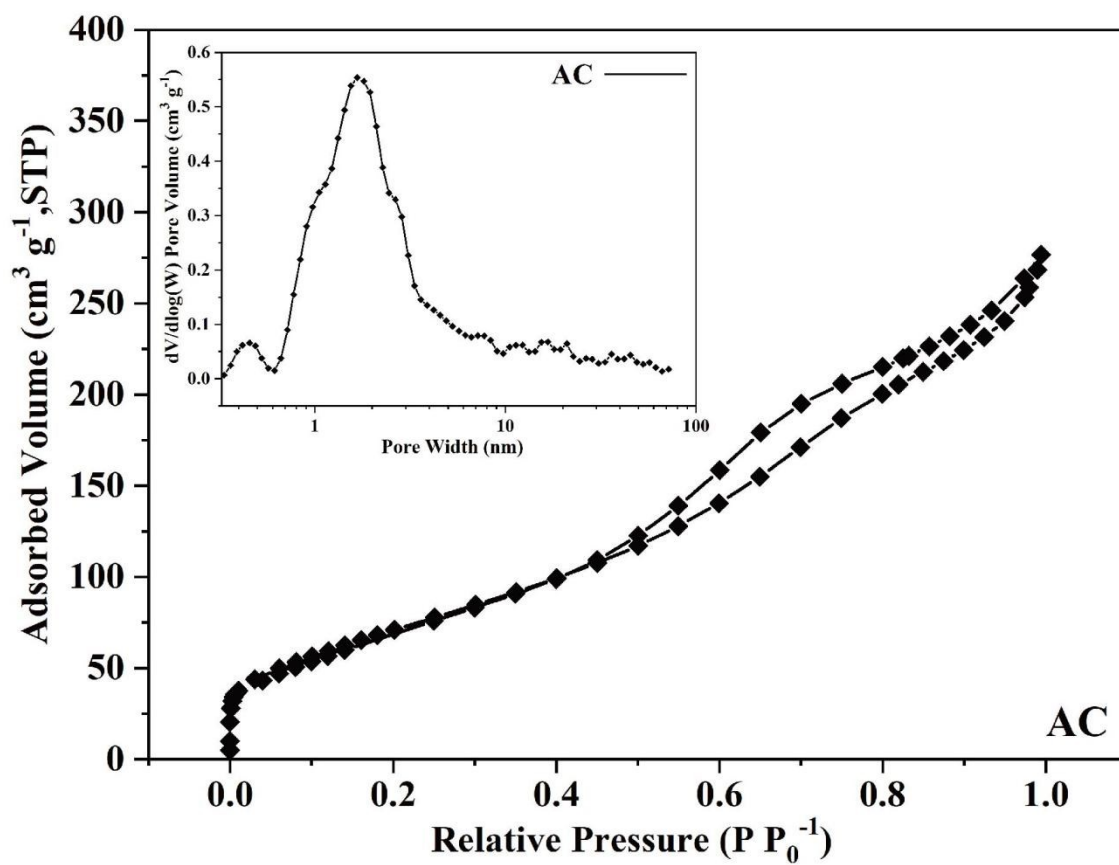

Fig. S8 BET curves of AC.

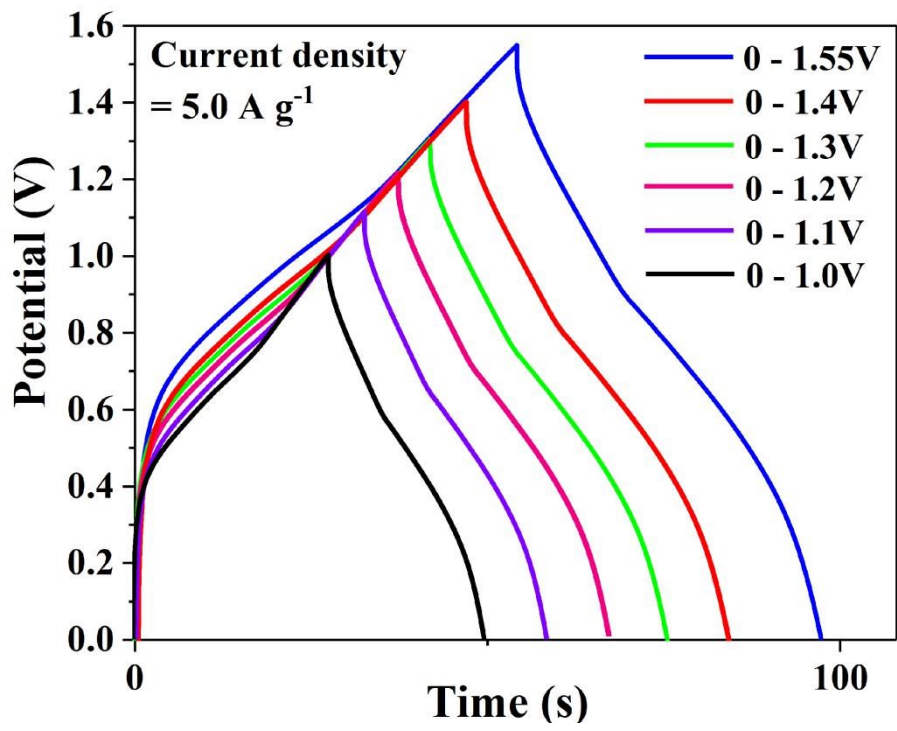

Fig. S9 GCD curves of ASC at different voltage window at 5 A g<sup>-1</sup>.

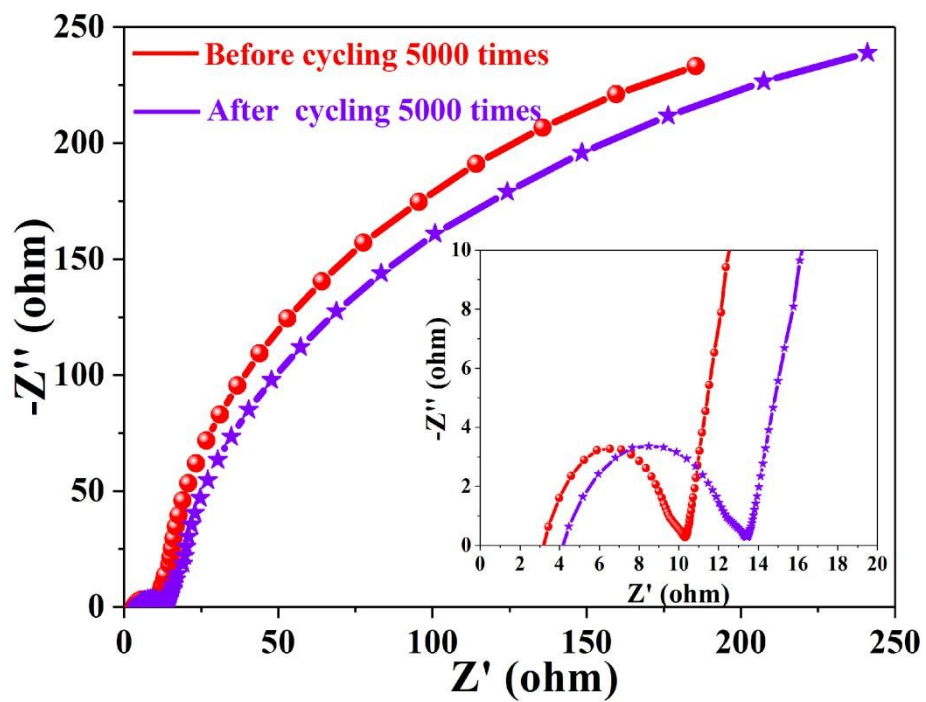

**Fig. S10** EIS plots of ASC before and after 5000 cycles.

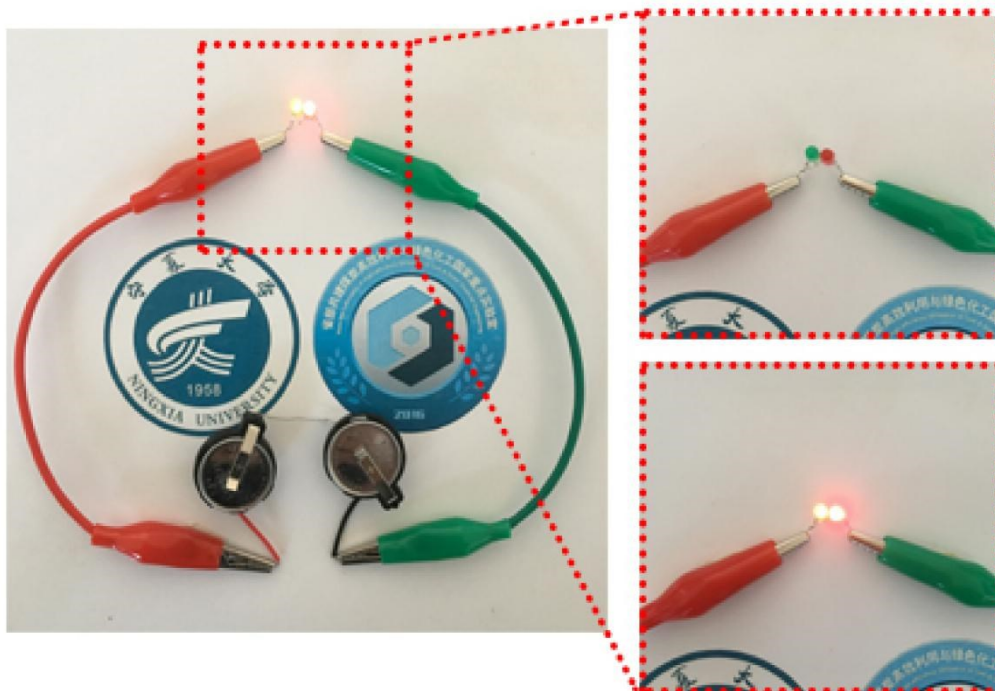

**Fig. S11** Images of a LED driven by two serried ASCs.



Formula S3 is used to calculate the electrode density of ASC.

$$\rho = \frac{m}{V} = \frac{m}{S \cdot h} = \frac{m}{\pi r^2 \cdot h} \quad (\text{Formula S3})$$

where  $m$ ,  $r$ , and  $h$  are the mass (g), radius (cm) and height (cm) of electrode, respectively. The electrode density of ASC calculated was  $0.36 \text{ g cm}^{-3}$  by using formula S3.
